# Supplementary material for: Proteomic Analysis of Outer Membrane Proteins from Salmonella Enteritidis Strains with Different Sensitivity to Human Serum
Source: PubMed Central journal article supplement (PMC5047454; doi:10.1371/journal.pone.0164069), 2016-10-03
Supplement: pone.0164069.s001.pdf [file pone.0164069.s001.pdf]

**MASCOT** SCIENCE Mascot Search Results

**Protein View**

Match to: **PGTE\_SALTY** Score: **147** Expect: **2.5e-011**  
**Outer membrane protease E OS=Salmonella typhimurium (strain LT2 / SGSC1412 / ATCC 700720) GN=pgtE PE=3 SV=2**

Nominal mass (M<sub>r</sub>): **35033**; Calculated pI value: **5.28**  
 NCBI BLAST search of **PGTE\_SALTY** against nr  
 Unformatted [sequence string](#) for pasting into other applications

Taxonomy: [Salmonella enterica subsp. enterica serovar Typhimurium str. LT2](#)

Variable modifications: Carbamidomethyl (C), Oxidation (M)  
 Cleavage by Trypsin: cuts C-term side of KR unless next residue is P  
 Number of mass values searched: **69**  
 Number of mass values matched: **19**  
 Sequence Coverage: **59%**

Matched peptides shown in **Bold Red**

```

1 MKKHAIIVMM IAVFSESUYA ESALFIPDVS PDSVTTLSLV GVLNGKSREL
51 VYDDTDGTRKL SQLDWKIKNV ATLQGDLSWE PYSFMTLDAR GWTSLASGSG
101 HMVDHDMWSS EQPGWTRDSI HPDTSVNYAN EYDLNVKGWL LQGDNYKAGV
151 TAGYQETRFS WTARGGSIYI DNGRYIGNFP HGVRGIGYSQ RFEMPYIGLA
201 GDYRINDFEC NVLFKYSDWV NAHDNDEHYM RKLTFREKTE NSRYYGASID
251 AGYYITSNAK IFAEFAYSKY EEGKGGTQII DKTSGDTAYF GGDAAGIANN
301 NYTVTAGLQY RF
    
```

Show predicted peptides also

Sort Peptides By  Residue Number  Increasing Mass  Decreasing Mass

| Start - End | Observed  | Mr (expt) | Mr (calc) | ppm | Miss | Sequence                                        |
|-------------|-----------|-----------|-----------|-----|------|-------------------------------------------------|
| 49 - 58     | 1168.5525 | 1167.5452 | 1167.5408 | 4   | 0    | <b>R.ELVYD</b> TD <b>TGR.K</b>                  |
| 49 - 59     | 1296.6580 | 1295.6507 | 1295.6357 | 12  | 1    | <b>R.ELVYD</b> TD <b>TGRK.L</b>                 |
| 69 - 90     | 2514.2189 | 2513.2116 | 2513.1897 | 9   | 0    | <b>K.NVATLQGDLSWEPYSFMTLDAR.G</b>               |
| 69 - 90     | 2530.1897 | 2529.1824 | 2529.1846 | -1  | 0    | <b>K.NVATLQGDLSWEPYSFMTLDAR.G</b> Oxidation (M) |
| 138 - 147   | 1193.6054 | 1192.5981 | 1192.5877 | 9   | 0    | <b>K.GWLLQGDNYK.A</b>                           |
| 148 - 158   | 1152.5659 | 1151.5586 | 1151.5571 | 1   | 0    | <b>K.AGVTAGYQETR.F</b>                          |
| 159 - 164   | 767.3754  | 766.3681  | 766.3762  | -11 | 0    | <b>R.FSWTAR.G</b>                               |
| 165 - 174   | 1101.4869 | 1100.4796 | 1100.4887 | -8  | 0    | <b>R.GGSYI</b> DNGR.Y                           |
| 175 - 184   | 1159.5862 | 1158.5790 | 1158.5934 | -12 | 0    | <b>R.YIGNFPHGVR.G</b>                           |
| 185 - 191   | 780.3949  | 779.3876  | 779.3926  | -6  | 0    | <b>R.GIGYSQR.F</b>                              |
| 192 - 204   | 1531.7217 | 1530.7144 | 1530.7177 | -2  | 0    | <b>R.FEMPYI</b> GLAGDYR.I                       |
| 192 - 204   | 1547.7058 | 1546.6985 | 1546.7126 | -9  | 0    | <b>R.FEMPYI</b> GLAGDYR.I Oxidation (M)         |
| 205 - 215   | 1398.6746 | 1397.6674 | 1397.6649 | 2   | 0    | <b>R.INDFEC</b> NVLFK.Y Carbamidomethyl (C)     |
| 216 - 231   | 2051.8129 | 2050.8056 | 2050.8228 | -8  | 0    | <b>K.YSDWVNAHDNDEHYMR.K</b>                     |
| 216 - 231   | 2067.8035 | 2066.7963 | 2066.8177 | -10 | 0    | <b>K.YSDWVNAHDNDEHYMR.K</b> Oxidation (M)       |
| 232 - 236   | 664.4184  | 663.4111  | 663.4068  | 7   | 1    | <b>R.KLTFR.E</b>                                |
| 244 - 260   | 1856.8642 | 1855.8569 | 1855.8628 | -3  | 0    | <b>R.YYGASID</b> AGYYITSNAK.I                   |
| 261 - 269   | 1075.5406 | 1074.5333 | 1074.5386 | -5  | 0    | <b>K.IFAEFAYS</b> K.Y                           |
| 283 - 311   | 2968.3641 | 2967.3568 | 2967.3635 | -2  | 0    | <b>K.TSGDTAYFGDAAGIANN</b> NYTVTAGLQYR.F        |

No match to: 608.3377, 644.0112, 662.2948, 666.0136, 832.2928, 833.0584, 855.0329, 856.5275, 870.5537, 871.0027, 908.5037, !

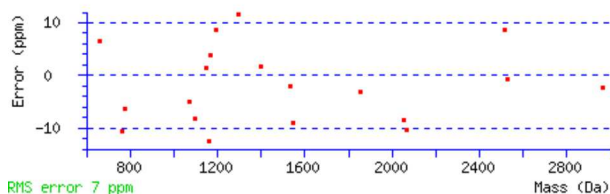

```

ID PGTE_SALTY Reviewed; 312 AA.
AC P06185; Q9KI72;
DT 01-JAN-1988, integrated into UniProtKB/Swiss-Prot.
DT 23-JAN-2002, sequence version 2.
DT 16-MAY-2012, entry version 100.
DE RecName: Full=Outer membrane protease E;
DE Short=E protein;
DE EC=3.4.23.-;
DE Flags: Precursor;
GN Name=pgtE; Synonyms=prtA; OrderedLocusNames=STM2395;
OS Salmonella typhimurium (strain LT2 / SGSC1412 / ATCC 700720).
OC Bacteria; Proteobacteria; Gammaproteobacteria; Enterobacteriales;
OC Enterobacteriaceae; Salmonella;
OC Salmonella enterica subsp. enterica serovar Typhimurium.
OX NCBI_TaxID=99287;
RN [1]
RP NUCLEOTIDE SEQUENCE [GENOMIC DNA].
RX MEDLINE=87055265; PubMed=3023201; DOI=10.1016/0378-1119(86)90131-9;
RA Yu G.-Q., Hong J.-S.;
RT "Identification and nucleotide sequence of the activator gene of the
RT externally induced phosphoglycerate transport system of Salmonella
RT typhimurium.";
RL Gene 45:51-57(1986).
RN [2]
    
```

RP NUCLEOTIDE SEQUENCE [GENOMIC DNA].  
RX MEDLINE=20327590; PubMed=10869088;  
RX DOI=10.1128/JB.182.14.4077-4086.2000;  
RA Guina T., Yi E.C., Wang H., Hackett M., Miller S.I.;  
RT "A PhoP-regulated outer membrane protease of Salmonella enterica  
RT serovar typhimurium promotes resistance to alpha-helical antimicrobial  
RT peptides.";  
RL J. Bacteriol. 182:4077-4086(2000).  
RN [3]  
RP NUCLEOTIDE SEQUENCE [LARGE SCALE GENOMIC DNA].  
RC STRAIN=LT2 / SGSC1412 / ATCC 700720;  
RX MEDLINE=21534948; PubMed=11677609; DOI=10.1038/35101614;  
RA McClelland M., Sanderson K.E., Spieth J., Clifton S.W., Latreille P.,  
RA Courtney L., Porwollik S., Ali J., Dante M., Du F., Hou S., Layman D.,  
RA Leonard S., Nguyen C., Scott K., Holmes A., Grewal N., Mulvaney E.,  
RA Ryan E., Sun H., Florea L., Miller W., Stoneking T., Nhan M.,  
RA Waterston R., Wilson R.K.;  
RT "Complete genome sequence of Salmonella enterica serovar Typhimurium  
RT LT2.";  
RL Nature 413:852-856(2001).  
RN [4]  
RP SIMILARITY TO OMPT, AND FUNCTION.  
RX MEDLINE=89213991; PubMed=2651422;  
RA Grodberg J., Dunn J.J.;  
RT "Comparison of Escherichia coli K-12 outer membrane protease OmpT and  
RT Salmonella typhimurium E protein.";  
RL J. Bacteriol. 171:2903-2905(1989).  
CC !- FUNCTION: Protease that can cleave T7 RNA polymerase. Specific for  
CC paired basic residues.  
CC !- SUBCELLULAR LOCATION: Cell outer membrane; Multi-pass membrane  
CC protein (By similarity).  
CC !- SIMILARITY: Belongs to the peptidase A26 family.  
CC !- SEQUENCE CAUTION:  
CC Sequence=AAA27185.1; Type=Frameshift; Positions=7, 278, 288, 295;  
CC -----  
CC Copyrighted by the UniProt Consortium, see <http://www.uniprot.org/terms>  
CC Distributed under the Creative Commons Attribution-NoDerivs License  
CC -----  
DR EMBL; M13923; AAA27185.1; ALT\_FRAME; Genomic\_DNA.  
DR EMBL; AF239770; AAF85951.1; -; Genomic\_DNA.  
DR EMBL; AE006468; AAL21295.1; -; Genomic\_DNA.  
DR PIR; B28255; B28255.  
DR RefSeq; NP\_461336.1; NC\_003197.1.  
DR ProteinModelPortal; P06185; -.  
DR MEROPS; A26.004; -.  
DR PRIDE; P06185; -.  
DR GeneID; 1253917; -.  
DR GenomeReviews; AE006468\_GR; STM2395.  
DR KEGG; stm:STM2395; -.  
DR PATRIC; 32383409; VBISalEnt20916\_2533.  
DR eggNOG; COG4571; -.  
DR HOGENOM; HOG000117799; -.  
DR KO; K08477; -.  
DR OMA; SQLDWRI; -.  
DR ProtClustDB; PRK10993; -.  
DR BioCyc; STYP99287:STM2395-MONOMER; -.  
DR GO; GO:0009279; C:cell outer membrane; IEA:UniProtKB-SubCell.  
DR GO; GO:0016021; C:integral to membrane; IEA:UniProtKB-KW.  
DR GO; GO:0005886; C:plasma membrane; IEA:UniProtKB-KW.  
DR GO; GO:0004190; F:aspartic-type endopeptidase activity; IEA:UniProtKB-KW.  
DR GO; GO:0006508; P:proteolysis; IEA:UniProtKB-KW.  
DR Gene3D; G3DSA:2.40.128.90; Peptidase\_A26; 1.  
DR InterPro; IPR020080; OM\_adhesin/peptidase\_omptin.  
DR InterPro; IPR023619; Peptidase\_A26.  
DR InterPro; IPR020079; Peptidase\_A26\_CS.  
DR InterPro; IPR000036; Peptidase\_A26\_omptin.  
DR Pfam; PF01278; Omptin; 1.  
DR PIRSF; PIRSF001522; Peptidase\_A26; 1.  
DR PRINTS; PR00482; OMPTIN.  
DR SUPFAM; SSF69917; OM\_adhesin/protease\_omptin; 1.  
DR PROSITE; PS00834; OMPTIN\_1; 1.  
DR PROSITE; PS00835; OMPTIN\_2; 1.  
PE 3: Inferred from homology;  
KW Aspartyl protease; Cell membrane; Cell outer membrane;  
KW Complete proteome; Hydrolase; Membrane; Protease; Reference proteome;  
KW Signal; Transmembrane; Transmembrane beta strand.  
FT SIGNAL 1 37 Potential.  
FT CHAIN 38 312 Outer membrane protease E.  
FT /FTid=PRO\_0000025818.  
FT ACT\_SITE 104 104 By similarity.  
FT ACT\_SITE 106 106 By similarity.  
FT ACT\_SITE 226 226 By similarity.  
FT ACT\_SITE 228 228 By similarity.  
FT CONFLICT 296 296 G -> S (in Ref. 1).  
SQ SEQUENCE 312 AA; 35055 MW; 5A6841732AF2E8C4 CRC64;  
MKKHAIAVMM IAVFSESVYA ESALFIPDVS PDSVTTSLSV GVLNGKSREL VYDSTDGRKL  
SQLDVKIKNV ATLDGDLSE PYSFMTLGAR GWTSLSGSG HMDVHDMSS EQPGWTRSI  
HPDTSVNYAN EFDLNVKGLW LQGDNYKAGV TAGYQETFRS WTARGGSYIY DNGRYIGNFP  
HGVRGIGYSQ RFEMPYIGLA GDYRINDFEC NVLFKYSDDV NAHDNDEHYM RKLTPREKTE  
NSRYYGASID AGYYITSNAK IFAEFAYSKY EEGKGGTQII DKTSGDYAYF GGDAAGIANN  
NYTVTAGLQY RF
