# Supplementary material for: Proteomic Analysis of Outer Membrane Proteins from Salmonella Enteritidis Strains with Different Sensitivity to Human Serum
Source: PubMed Central journal article supplement (PMC5047454; doi:10.1371/journal.pone.0164069), 2016-10-03
Supplement: pone.0164069.s002.pdf [file pone.0164069.s002.pdf]

**MASCOT** SCIENCE Mascot Search Results

**Protein View**

Match to: **FLID\_SALTY** Score: 135 Expect: 4e-010  
**Flagellar hook-associated protein 2 OS=Salmonella typhimurium (strain LT2 / SGSC1412 / ATCC 700720) GN=fliD PE=1 SV=2**

Nominal mass (M<sub>r</sub>): 49805; Calculated pI value: 5.27  
 NCBI BLAST search of [FLID\\_SALTY](#) against nr  
 Unformatted [sequence string](#) for pasting into other applications

Taxonomy: [Salmonella enterica subsp. enterica serovar Typhimurium str. LT2](#)

Variable modifications: Carbamidomethyl (C), Oxidation (M)  
 Cleavage by Trypsin: cuts C-term side of KR unless next residue is P  
 Number of mass values searched: 87  
 Number of mass values matched: 24  
 Sequence Coverage: 61%

Matched peptides shown in **Bold Red**

```

1  MASISSLVGVG SNLPLDQLLT DLTKNEKGRL TPITKQOSAN SAKLTAYGTL
51  KSALEKFQTA NTALNKADLF KSTVASSTTE DLKVSTTAGA AAGTYKINVT
101 QLAAAQSLAT KTTFATTKEQ LGDTSVTSRT IKIEQPGRKE PLEIKLDKGD
151 TSMEAIRDAI NDADSGIAAS IVKVKENEFQ LVLTANSGTD NTMKITVEGD
201 TKLNDLLAYD STTNTGNMQE LVKAENAKLN VNGIDIERQS NTVTDAPQGI
251 TLTLTKKVTD ATVTVTKDDT KAKEAIKSW DAYNSLVDTF SSLTKYTAVE
301 PGEASDKNG ALLGDSVVRT IQTGIRAQFA NSGSNSAFKT MAEIGITQDG
351 TSGKLKIDDD KLTKVLKDNT AAARELLVGD GKETGITTKI ATEVKSYLAD
401 DGIIDNAQDN VNATLKSLTK QYLSVSNSID ETVARYKAQF TQLDTMMSKL
451 NNTSSYLTQQ FTAMNKS
    
```

Show predicted peptides also

Sort Peptides By  Residue Number  Increasing Mass  Decreasing Mass

| Start - End | Observed  | Mr(expt)  | Mr(calc)  | ppm | Miss | Sequence                                     |
|-------------|-----------|-----------|-----------|-----|------|----------------------------------------------|
| 2 - 24      | 2342.2781 | 2341.2708 | 2341.2740 | -1  | 0    | M.ASISSLVGVGSNLPLDQLLDTLK.N                  |
| 57 - 66     | 1107.5633 | 1106.5560 | 1106.5720 | -14 | 0    | K.FQTANTALNK.A                               |
| 97 - 111    | 1528.8687 | 1527.8614 | 1527.8620 | -0  | 0    | K.INVTQLAAAQSLATK.T                          |
| 119 - 129   | 1192.5864 | 1191.5791 | 1191.5732 | 5   | 0    | K.EQLGDTSVTSR.T                              |
| 133 - 138   | 699.3677  | 698.3604  | 698.3711  | -15 | 0    | K.IEQPGR.K                                   |
| 149 - 173   | 2520.2265 | 2519.2192 | 2519.2173 | 1   | 1    | K.GDTSMEAIRDAINDADSGIAASIVK.V                |
| 149 - 173   | 2536.2191 | 2535.2118 | 2535.2122 | -0  | 1    | K.GDTSMEAIRDAINDADSGIAASIVK.V Oxidation (M)  |
| 203 - 223   | 2340.1412 | 2339.1340 | 2339.1315 | 1   | 0    | K.LNDLLAYDSTTNTGNMQELVK.A                    |
| 203 - 223   | 2356.1374 | 2355.1302 | 2355.1264 | 2   | 0    | K.LNDLLAYDSTTNTGNMQELVK.A Oxidation (M)      |
| 229 - 238   | 1142.6162 | 1141.6089 | 1141.6091 | -0  | 0    | K.LNVNGIDIER.Q                               |
| 239 - 256   | 1887.9987 | 1886.9915 | 1886.9949 | -2  | 0    | R.QSNTVTDAPQGITTTLTK.K                       |
| 258 - 271   | 1493.7317 | 1492.7245 | 1492.7621 | -25 | 1    | K.VTDATVTVTKDDTK.A                           |
| 278 - 295   | 2032.9838 | 2031.9765 | 2031.9789 | -1  | 0    | K.SWVDAYNSLVDTFSSSLTK.Y                      |
| 309 - 319   | 1100.6040 | 1099.5968 | 1099.5986 | -2  | 0    | K.NGALLGDSVVR.T                              |
| 320 - 326   | 788.4555  | 787.4482  | 787.4552  | -9  | 0    | R.TIQTGIR.A                                  |
| 327 - 339   | 1328.6252 | 1327.6179 | 1327.6157 | 2   | 0    | R.AQFANSNGSNSAFK.T                           |
| 340 - 356   | 1765.7321 | 1764.7249 | 1764.8928 | -95 | 1    | K.TMAEIGITQDGTSGKLG.I Oxidation (M)          |
| 396 - 416   | 2250.0839 | 2249.0766 | 2249.0811 | -2  | 0    | K.SYLADDGIIDNAQDNVNATLK.S                    |
| 421 - 435   | 1681.8376 | 1680.8304 | 1680.8319 | -1  | 0    | K.QYLSVNSIDETVAR.Y                           |
| 436 - 449   | 1707.7717 | 1706.7644 | 1706.8008 | -21 | 1    | R.YKAQFTQLDTMMSK.L Oxidation (M)             |
| 438 - 449   | 1400.6553 | 1399.6480 | 1399.6476 | 0   | 0    | K.AQFTQLDTMMSK.L                             |
| 438 - 449   | 1416.6540 | 1415.6468 | 1415.6425 | 3   | 0    | K.AQFTQLDTMMSK.L Oxidation (M)               |
| 450 - 466   | 1960.9385 | 1959.9312 | 1959.9360 | -2  | 0    | K.LNNTSSYL <b>TQQFTAMNK</b> .S               |
| 450 - 466   | 1976.9327 | 1975.9255 | 1975.9309 | -3  | 0    | K.LNNTSSYL <b>TQQFTAMNK</b> .S Oxidation (M) |

No match to: 634.2548, 644.0073, 662.2896, 832.3028, 855.0469, 881.2513, 1036.5412, 1060.0607, 1109.5032, 1143.6116, 1193.6.

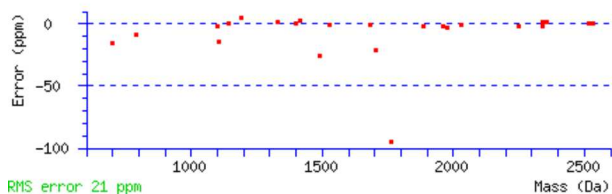

```

ID FLID_SALTY Reviewed; 467 AA.
AC P16328;
DT 01-AUG-1990, integrated into UniProtKB/Swiss-Prot.
DT 23-JAN-2007, sequence version 2.
DT 16-MAY-2012, entry version 81.
DE RecName: Full=Flagellar hook-associated protein 2;
DE Short=HAP2;
DE AltName: Full=Filament cap protein;
DE AltName: Full=Flagellar cap protein;
GN Name=fliD; Synonyms=flaV, flbC; OrderedLocusNames=STM1960;
OS Salmonella typhimurium (strain LT2 / SGSC1412 / ATCC 700720).
OC Bacteria; Proteobacteria; Gammaproteobacteria; Enterobacteriales;
OC Enterobacteriaceae; Salmonella;
OC Salmonella enterica subsp. enterica serovar Typhimurium.
OX NCBI_TaxID=99287;
RN [1]
    
```

RP NUCLEOTIDE SEQUENCE [GENOMIC DNA].  
RX MEDLINE=90294298; PubMed=2193164; DOI=10.1016/S0022-2836(05)80266-9;  
RA Homma M., Derosier D.J., Macnab R.M.;  
RT "Flagellar hook and hook-associated proteins of Salmonella typhimurium  
and their relationship to other axial components of the flagellum."  
RL J. Mol. Biol. 213:819-832(1990).  
RN [2]  
RP NUCLEOTIDE SEQUENCE [LARGE SCALE GENOMIC DNA].  
RC STRAIN=LT2 / SGSC1412 / ATCC 700720;  
RX MEDLINE=21534948; PubMed=11677609; DOI=10.1038/35101614;  
RA McClelland M., Sanderson K.E., Spieth J., Clifton S.W., Latreille P.,  
RA Courtney L., Porwollik S., Ali J., Dante M., Du F., Hou S., Layman D.,  
RA Leonard S., Nguyen C., Scott K., Holmes A., Grewal N., Mulvaney E.,  
RA Ryan E., Sun H., Florea L., Miller W., Stoneking T., Nhan M.,  
RA Waterston R., Wilson R.K.;  
RT "Complete genome sequence of Salmonella enterica serovar Typhimurium  
LT2."  
RL Nature 413:852-856(2001).  
RN [3]  
RP NUCLEOTIDE SEQUENCE [GENOMIC DNA] OF 441-467.  
RC STRAIN=SJW1103;  
RX MEDLINE=92407478; PubMed=1527488;  
RA Kawagishi I., Mueller V., Williams A.W., Irikura V.M., Macnab R.M.;  
RT "Subdivision of flagellar region III of the Escherichia coli and  
Salmonella typhimurium chromosomes and identification of two  
additional flagellar genes."  
RL J. Gen. Microbiol. 138:1051-1065(1992).  
RN [4]  
RP SUBUNIT.  
RX MEDLINE=99096876; PubMed=9878359; DOI=10.1006/jmbi.1998.2274;  
RA Vonderviszt F., Imada K., Furukawa Y., Uedaira H., Taniguchi H.,  
RA Namba K.;  
RT "Mechanism of self-association and filament capping by flagellar  
HAP2."  
RL J. Mol. Biol. 284:1399-1416(1998).  
RN [5]  
RP SUBUNIT.  
RX MEDLINE=20568409; PubMed=11118149; DOI=10.1126/science.290.5499.2148;  
RA Yonekura K., Maki S., Morgan D.G., DeRosier D.J., Vonderviszt F.,  
RA Imada K., Namba K.;  
RT "The bacterial flagellar cap as the rotary promoter of flagellin self-  
assembly."  
RL Science 290:2148-2152(2000).  
CC !- FUNCTION: Required for the morphogenesis and for the elongation of  
CC the flagellar filament by facilitating polymerization of the  
CC flagellin monomers at the tip of growing filament. Forms a capping  
CC structure, which prevents flagellin subunits (transported through  
CC the central channel of the flagellum) from leaking out without  
CC polymerization at the distal end.  
CC !- SUBUNIT: Homopentamer.  
CC !- SUBCELLULAR LOCATION: Secreted. Bacterial flagellum.  
CC !- SIMILARITY: Belongs to the fliD family.  
CC -----  
CC Copyrighted by the UniProt Consortium, see <http://www.uniprot.org/terms>  
CC Distributed under the Creative Commons Attribution-NoDerivs License  
CC -----  
DR EMBL; X51740; CAA36030.1; -; Genomic\_DNA.  
DR EMBL; AE006468; AAL20872.1; -; Genomic\_DNA.  
DR EMBL; M85241; AAA27076.1; -; Genomic\_DNA.  
DR PIR; S10364; S10364.  
DR RefSeq; NP\_460913.1; NC\_003197.1.  
DR ProteinModelPortal; P16328; -.  
DR PRIDE; P16328; -.  
DR GeneID; 1253481; -.  
DR GenomeReviews; AE006468\_GR; STM1960.  
DR KEGG; stm:STM1960; -.  
DR PATRIC; 32382481; VBISalEnt20916\_2076.  
DR eggNOG; COG1345; -.  
DR HOGENOM; HOG000254632; -.  
DR KO; K02407; -.  
DR OMA; FRTQISA; -.  
DR ProtClustDB; PRK08032; -.  
DR BioCyc; STYP99287:STM1960-MONOMER; -.  
DR GO; GO:0009288; C:bacterial-type flagellum; IEA:UniProtKB-SubCell.  
DR GO; GO:0005576; C:extracellular region; IEA:UniProtKB-SubCell.  
DR GO; GO:0007155; P:cell adhesion; IEA:InterPro.  
DR GO; GO:0006928; P:cellular component movement; IEA:InterPro.  
DR GO; GO:0009296; P:flagellum assembly; IEA:InterPro.  
DR InterPro; IPR010810; Flagellin\_hook\_IN\_motif.  
DR InterPro; IPR010809; FliD\_C.  
DR InterPro; IPR003481; FliD\_N.  
DR Pfam; PF07196; Flagellin\_IN; 1.  
DR Pfam; PF07195; FliD\_C; 1.  
DR Pfam; PF02465; FliD\_N; 1.  
PE 1: Evidence at protein level;  
KW Bacterial flagellum; Coiled coil; Complete proteome;  
KW Reference proteome; Secreted.  
FT INIT\_MET 1 1 Removed.  
FT CHAIN 2 467 Flagellar hook-associated protein 2.  
FT /FTid=PRO\_0000177024.  
FT COILED 411 439 Potential.  
SQ SEQUENCE 467 AA; 49835 MW; 5C1BD69A1F233BEA CRC64;  
MASISSLGVG SNLPLDQLLT DLTKNEKGRLL TPITKQQSAN SAKLTAQYGL KSALEKFQTA  
NTALNKADLF KSTVASSTTE DLKVSTTAGA AAGTYKINVT QLAAAQSLAT KTFATTKEQ  
LGDTSVTSRT IKIEQPGRKE PLEIKLDKGD TSMEAIRDAI NDADSGIAAS IVKVKENEQFQ  
LVLVTANSQTD NTMKITVEGD TKLNDLLAYD STTNTGNMQE LVKAENAKLN VNGIDIERQS  
NTVTDAPQGI TLTLTKKVD ATVTVTKDDT KAKEAIKSWV DAYNSLVDTF SSLTKYTAVE  
PGEASDKNG ALLGDSVVRT IQTGIRAQFA NSGSNSAFKT MAEIGITQDG TSGKLIKIDD  
KLTKVKLDNT AAARELLVGD GKETGITTKI ATEVKSYLAD DGIIDNAQDN VNATLKSLLTK

QYLSVNSID ETVARYKAQF TQLDTMMSKL NNTSSYLTQQ FTAMNKS

**Mascot:** <http://www.matrixscience.com/>
