# Supplementary material for: Proteomic Analysis of Outer Membrane Proteins from Salmonella Enteritidis Strains with Different Sensitivity to Human Serum
Source: PubMed Central journal article supplement (PMC5047454; doi:10.1371/journal.pone.0164069), 2016-10-03
Supplement: pone.0164069.s003.pdf [file pone.0164069.s003.pdf]

**MASCOT** SCIENCE Mascot Search Results

**Protein View**

Match to: **FLID\_SALTY** Score: **98** Expect: **1.9e-006**  
**Flagellar hook-associated protein 2 OS=Salmonella typhimurium (strain LT2 / SGSC1412 / ATCC 700720) GN=flid PE=1 SV=2**

Nominal mass (M<sub>r</sub>): **49805**; Calculated pI value: **5.27**  
 NCBI BLAST search of **FLID\_SALTY** against nr  
 Unformatted [sequence string](#) for pasting into other applications

Taxonomy: [Salmonella enterica subsp. enterica serovar Typhimurium str. LT2](#)

Variable modifications: Carbamidomethyl (C), Oxidation (M)  
 Cleavage by Trypsin: cuts C-term side of KR unless next residue is P  
 Number of mass values searched: **50**  
 Number of mass values matched: **13**  
 Sequence Coverage: **36%**

Matched peptides shown in **Bold Red**

```

1 MASISLGLVGV SNLPLDQLLT DLTKNEKGRLL TPITKQOSAN SAKLTAYGTL
51 KSALEKFQTA NTALNKADLF KSTVASSTTE DLKVSTTAGA AAGTYKINVT
101 QLAAQSLAT KTTTFATTKEQ LGDTSVTSRT IKIEQPGRKE PLEIKLDKGD
151 TSMEAIRDAI NDADSGIAAS IVKVKENEFQ LVLTANSGTD NTMKITVEGD
201 TKLNDLLAYD STTNTGNMQE LVKAENAKLN VNGIDIERQS NTVTDAPQGI
251 TLTLTKKVTD ATVTVTKDDT KAKEAIKSWV DAYNSLVDTF SSLTKYTAVE
301 PGEEASDKNG ALLGDSVVRT IQTGIRAQFA NSGSNSAFKT MAEIGITQDG
351 TSGYKLKIDDD KLTKVLKDNT AAARELLVGD GKETGITTKI ATEVKSYLAD
401 DGIIDNAQDN VNATLKSLTK QYLSVSNSISID ETVARYKAQF TQLDTMMSKL
451 NNTSSYLTQQ FTAMNKS
    
```

Show predicted peptides also

Sort Peptides By  Residue Number  Increasing Mass  Decreasing Mass

| Start - End | Observed  | Mr(expt)  | Mr(calc)  | ppm | Miss | Sequence                                                                   |
|-------------|-----------|-----------|-----------|-----|------|----------------------------------------------------------------------------|
| 57 - 66     | 1107.5593 | 1106.5520 | 1106.5720 | -18 | 0    | <b>K.FQTANTALNK.A</b>                                                      |
| 97 - 111    | 1528.8756 | 1527.8684 | 1527.8620 | 4   | 0    | <b>K.INVTQLAAQSLATK.T</b>                                                  |
| 174 - 194   | 2339.1859 | 2338.1786 | 2338.1475 | 13  | 1    | <b>K.VKENE<b>FQ</b>LVL<b>TANS</b>GT<b>D</b>NT<b>MK</b>.I</b>               |
| 174 - 194   | 2355.1866 | 2354.1793 | 2354.1424 | 16  | 1    | <b>K.VKENE<b>FQ</b>LVL<b>TANS</b>GT<b>D</b>NT<b>MK</b>.I</b> Oxidation (M) |
| 229 - 238   | 1142.6248 | 1141.6176 | 1141.6091 | 7   | 0    | <b>K.LNVNGIDIER.Q</b>                                                      |
| 258 - 271   | 1493.7333 | 1492.7260 | 1492.7621 | -24 | 1    | <b>K.VTDATVTVTKDDTK.A</b>                                                  |
| 278 - 295   | 2032.9860 | 2031.9787 | 2031.9789 | -0  | 0    | <b>K.SWVDAYNSLVDTFSSLT<b>K</b>.Y</b>                                       |
| 309 - 319   | 1100.6029 | 1099.5956 | 1099.5986 | -3  | 0    | <b>K.NGALLGDSVVR.T</b>                                                     |
| 320 - 326   | 788.4559  | 787.4487  | 787.4552  | -8  | 0    | <b>R.TIQTGIR.A</b>                                                         |
| 327 - 339   | 1328.6267 | 1327.6194 | 1327.6157 | 3   | 0    | <b>R.AQFANGSGNSAFK.T</b>                                                   |
| 396 - 416   | 2250.1251 | 2249.1178 | 2249.0811 | 16  | 0    | <b>K.SYLADDGIIDNAQDNVNATL<b>K</b>.S</b>                                    |
| 421 - 435   | 1681.8403 | 1680.8330 | 1680.8319 | 1   | 0    | <b>K.QYLSVNSISIDETVAR.Y</b>                                                |
| 436 - 449   | 1707.7696 | 1706.7623 | 1706.8008 | -23 | 1    | <b>R.YKAQFTQLDTMMSK.L</b> Oxidation (M)                                    |

No match to: 628.0453, 644.0066, 650.0311, 662.2878, 666.0072, 832.2875, 833.0613, 855.0439, 870.5380, 871.0200, 973.5341, :

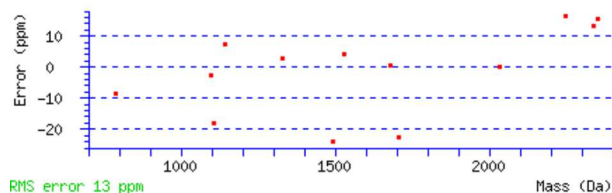

```

ID FLID_SALTY Reviewed; 467 AA.
AC P16328;
DT 01-AUG-1990, integrated into UniProtKB/Swiss-Prot.
DT 23-JAN-2007, sequence version 2.
DT 16-MAY-2012, entry version 81.
DE RecName: Full=Flagellar hook-associated protein 2;
DE Short=HAP2;
DE AltName: Full=Filament cap protein;
DE AltName: Full=Flagellar cap protein;
GN Name=flid; Synonyms=flaV, flbC; OrderedLocusNames=STM1960;
OS Salmonella typhimurium (strain LT2 / SGSC1412 / ATCC 700720).
OC Bacteria; Proteobacteria; Gammaproteobacteria; Enterobacteriales;
OC Enterobacteriaceae; Salmonella;
OC Salmonella enterica subsp. enterica serovar Typhimurium.
OX NCBI_TaxID=99287;
RN [1]
RP NUCLEOTIDE SEQUENCE [GENOMIC DNA].
RX MEDLINE=90294298; PubMed=2193164; DOI=10.1016/S0022-2836(05)80266-9;
RA Homma M., Derosier D.J., Macnab R.M.;
RT "Flagellar hook and hook-associated proteins of Salmonella typhimurium
RT and their relationship to other axial components of the flagellum.";
RL J. Mol. Biol. 213:819-832(1990).
RN [2]
RP NUCLEOTIDE SEQUENCE [LARGE SCALE GENOMIC DNA].
RC STRAIN=LT2 / SGSC1412 / ATCC 700720;
RX MEDLINE=21534948; PubMed=11677609; DOI=10.1038/35101614;
RA McClelland M., Sanderson K.E., Spieth J., Clifton S.W., Latreille P.,
RA Courtney L., Porwollik S., Ali J., Dante M., Du F., Hou S., Layman D.,
    
```

RA Leonard S., Nguyen C., Scott K., Holmes A., Grewal N., Mulvaney E.,  
 RA Ryan E., Sun H., Florea L., Miller W., Stoneking T., Nhan M.,  
 RA Waterston R., Wilson R.K.;  
 RT "Complete genome sequence of Salmonella enterica serovar Typhimurium  
 RT LT2.";  
 RL Nature 413:852-856(2001).  
 RN [3]  
 RP NUCLEOTIDE SEQUENCE [GENOMIC DNA] OF 441-467.  
 RC STRAIN=SJW1103;  
 RX MEDLINE=92407478; PubMed=1527488;  
 RA Kawagishi I., Mueller V., Williams A.W., Irikura V.M., Macnab R.M.;  
 RT "Subdivision of flagellar region III of the Escherichia coli and  
 RT Salmonella typhimurium chromosomes and identification of two  
 RT additional flagellar genes.";  
 RL J. Gen. Microbiol. 138:1051-1065(1992).  
 RN [4]  
 RP SUBUNIT.  
 RX MEDLINE=99096876; PubMed=9878359; DOI=10.1006/jmbi.1998.2274;  
 RA Vonderviszt F., Imada K., Furukawa Y., Uedaira H., Taniguchi H.,  
 RA Namba K.;  
 RT "Mechanism of self-association and filament capping by flagellar  
 RT HAP2.";  
 RL J. Mol. Biol. 284:1399-1416(1998).  
 RN [5]  
 RP SUBUNIT.  
 RX MEDLINE=20568409; PubMed=11118149; DOI=10.1126/science.290.5499.2148;  
 RA Yonekura K., Maki S., Morgan D.G., DeRosier D.J., Vonderviszt F.,  
 RA Imada K., Namba K.;  
 RT "The bacterial flagellar cap as the rotary promoter of flagellin self-  
 RT assembly.";  
 RL Science 290:2148-2152(2000).  
 CC -!- FUNCTION: Required for the morphogenesis and for the elongation of  
 CC the flagellar filament by facilitating polymerization of the  
 CC flagellin monomers at the tip of growing filament. Forms a capping  
 CC structure, which prevents flagellin subunits (transported through  
 CC the central channel of the flagellum) from leaking out without  
 CC polymerization at the distal end.  
 CC -!- SUBUNIT: Homopentamer.  
 CC -!- SUBCELLULAR LOCATION: Secreted. Bacterial flagellum.  
 CC -!- SIMILARITY: Belongs to the flid family.  
 CC -----  
 CC Copyrighted by the UniProt Consortium, see <http://www.uniprot.org/terms>  
 CC Distributed under the Creative Commons Attribution-NoDerivs License  
 CC -----  
 DR EMBL; X51740; CAA36030.1; -; Genomic\_DNA.  
 DR EMBL; AE006468; AAL20872.1; -; Genomic\_DNA.  
 DR EMBL; M85241; AAA27076.1; -; Genomic\_DNA.  
 DR PIR; S10364; S10364.  
 DR RefSeq; NP\_460913.1; NC\_003197.1.  
 DR ProteinModelPortal; P16328; -.  
 DR PRIDE; P16328; -.  
 DR GeneID; 1253481; -.  
 DR GenomeReviews; AE006468\_GR; STM1960.  
 DR KEGG; stm:STM1960; -.  
 DR PATRIC; 32382481; VBISalEnt20916\_2076.  
 DR eggNOG; COG1345; -.  
 DR HOGENOM; HOG000254632; -.  
 DR KO; K02407; -.  
 DR OMA; FRTQISA; -.  
 DR ProtClustDB; PRK08032; -.  
 DR BioCyc; STYP99287:STM1960-MONOMER; -.  
 DR GO; GO:0009288; C:bacterial-type flagellum; IEA:UniProtKB-SubCell.  
 DR GO; GO:0005576; C:extracellular region; IEA:UniProtKB-SubCell.  
 DR GO; GO:0007155; P:cell adhesion; IEA:InterPro.  
 DR GO; GO:0006928; P:cellular component movement; IEA:InterPro.  
 DR GO; GO:0009296; P:flagellum assembly; IEA:InterPro.  
 DR InterPro; IPR010810; Flagellin\_hook\_IN\_motif.  
 DR InterPro; IPR010809; Flid\_C.  
 DR InterPro; IPR003481; Flid\_N.  
 DR Pfam; PF07196; Flagellin\_IN; 1.  
 DR Pfam; PF07195; Flid\_C; 1.  
 DR Pfam; PF02465; Flid\_N; 1.  
 PE 1: Evidence at protein level;  
 KW Bacterial flagellum; Coiled coil; Complete proteome;  
 KW Reference proteome; Secreted.  
 FT INIT\_MET 1 1 Removed.  
 FT CHAIN 2 467 Flagellar hook-associated protein 2.  
 FT /FTid=PRO\_0000177024.  
 FT COILED 411 439 Potential.  
 SQ SEQUENCE 467 AA; 49835 MW; 5C1BD69A1F233BEA CRC64;  
 MASISLGVG SNLPLDQLLT DLTKNEKGR L TPITKQQSAN SAKLTAYGTL KSALEKFQTA  
 NTALNKADLF KSTVASSTTE DLKVSTTAGA AAGTYKINVT QLAAAQSLAT KTFATTKEQ  
 LGDTSVTSRT IKIEQPGRKE PLEIKLDRGD TSMEAIRDAI NDADSGIAAS IVKVKENEFO  
 LVLVTANSSTD NTKMITVEGD TKLNDLLAYD STTNTGNMQE LVKAENAKLN VNGIDIERQS  
 NTVTDAPQGI TLTLTKKVD ATVTVTKDDT KAKEAIKSW DAYNSLVDTF SSLTKYTAVE  
 PGEASDKNG ALLGDSVVRT IQTGIRAQFA NSGSNSAFKT MAEIGITQDG TSGKLIKDD  
 KLTKVLKDNT AAARELLVGD GKETGITTKI ATEVKSYLEAD DGIIDNAQDN VNATLKSLLTK  
 QYLSVSN SID ETVARYKAQF TQLDTMMSKL NNTSSYLTOQ FTAMNKS
