# Supplementary material for: Proteomic Analysis of Outer Membrane Proteins from Salmonella Enteritidis Strains with Different Sensitivity to Human Serum
Source: PubMed Central journal article supplement (PMC5047454; doi:10.1371/journal.pone.0164069), 2016-10-03
Supplement: pone.0164069.s004.pdf [file pone.0164069.s004.pdf]

**MASCOT** SCIENCE Mascot Search Results

**Protein View**

Match to: **OMPA\_SALTY** Score: **138** Expect: **2e-010**  
**Outer membrane protein A OS=Salmonella typhimurium (strain LT2 / SGSC1412 / ATCC 700720) GN=ompA PE=3 SV=2**

Nominal mass (M<sub>r</sub>): **37492**; Calculated pI value: **5.60**  
 NCBI BLAST search of [OMPA\\_SALTY](#) against nr  
 Unformatted [sequence string](#) for pasting into other applications

Taxonomy: [Salmonella enterica subsp. enterica serovar Typhimurium str. LT2](#)

Variable modifications: Carbamidomethyl (C), Oxidation (M)  
 Cleavage by Trypsin: cuts C-term side of KR unless next residue is P  
 Number of mass values searched: **45**  
 Number of mass values matched: **16**  
 Sequence Coverage: **46%**

Matched peptides shown in **Bold Red**

```

1 MKKTAIAIAV ALAGFATVAQ AAPKDNTWYA GAKLGWSQYH DTGFIHNDGP
51 THENQLGAGA FGGYQVNPYV GFEMGYDWLG RMPYKGDNIN GAYKAQGVQL
101 TAKLGYPITD DLDVYTRLGG MVWRADTKSN VPGGPSTKDH DTGVSPVFAG
151 GIEYAITPEI ATRLEYQWTN NIGDANTIGT RPDNGLLSVG VSYRFGQQEA
201 APVVAPAPAP APEVQTKHFT LKSDVLFNFN KSTLKPEGQQ ALDQLYSQLS
251 NLDPKDGSVV VLGFTDRIGS DAYNQGLSEK RAQSVVDYLI SKGIPSDKIS
301 ARGMGESNPV TGNTCDNVKP RAALIDCLAP DRRVEIEVKG VKDVVTQPQA
351
    
```

Show predicted peptides also

Sort Peptides By  Residue Number  Increasing Mass  Decreasing Mass

| Start - End | Observed  | Mr (expt) | Mr (calc) | ppm | Miss | Sequence                                           |
|-------------|-----------|-----------|-----------|-----|------|----------------------------------------------------|
| 25 - 33     | 1025.4610 | 1024.4537 | 1024.4614 | -7  | 0    | <b>K.DNTWYAGAK.L</b>                               |
| 104 - 117   | 1640.7993 | 1639.7920 | 1639.8094 | -11 | 0    | <b>K.LGYFITDDLDVYTR.L</b>                          |
| 118 - 124   | 818.4228  | 817.4155  | 817.4269  | -14 | 0    | <b>R.LGGMVWR.A</b>                                 |
| 118 - 124   | 834.4288  | 833.4215  | 833.4218  | -0  | 0    | <b>R.LGGMVWR.A</b> Oxidation (M)                   |
| 139 - 163   | 2616.5466 | 2615.5394 | 2615.2868 | 97  | 0    | <b>K.DHDTGVSPVFAGGIEYAITPEIATR.L</b>               |
| 195 - 217   | 2303.2975 | 2302.2902 | 2302.1957 | 41  | 0    | <b>R.FGQEAAPVVAPAPAPAPEVQTK.H</b>                  |
| 223 - 231   | 1083.5485 | 1082.5413 | 1082.5397 | 1   | 0    | <b>K.SDVLFNFK.S</b>                                |
| 256 - 267   | 1264.6321 | 1263.6248 | 1263.6460 | -17 | 0    | <b>K.DGSVVVLGFTDR.I</b>                            |
| 268 - 280   | 1381.6573 | 1380.6500 | 1380.6521 | -1  | 0    | <b>R.IGSDAYNQGLSEK.R</b>                           |
| 268 - 281   | 1537.7366 | 1536.7293 | 1536.7532 | -16 | 1    | <b>R.IGSDAYNQGLSEK.R.A</b>                         |
| 281 - 292   | 1378.7443 | 1377.7371 | 1377.7616 | -18 | 1    | <b>K.RAQSVVDYLISK.G</b>                            |
| 303 - 321   | 2032.9644 | 2031.9572 | 2031.9102 | 23  | 0    | <b>R.GMGESNPVTGNTCDNVKPR.A</b> Carbamidomethyl (C) |
| 322 - 332   | 1157.5886 | 1156.5813 | 1156.5910 | -8  | 0    | <b>R.AALIDCLAPDR.R</b>                             |
| 322 - 332   | 1214.6054 | 1213.5982 | 1213.6125 | -12 | 0    | <b>R.AALIDCLAPDR.R</b> Carbamidomethyl (C)         |
| 322 - 333   | 1370.6942 | 1369.6869 | 1369.7136 | -19 | 1    | <b>R.AALIDCLAPDRR.V</b> Carbamidomethyl (C)        |
| 333 - 339   | 872.4874  | 871.4801  | 871.5127  | -37 | 1    | <b>R.RVEIEVK.G</b>                                 |

No match to: 608.3076, 643.9765, 662.2539, 832.2619, 833.0444, 855.0124, 870.9773, 973.5256, 1060.0080, 1065.5099, 1193.5971

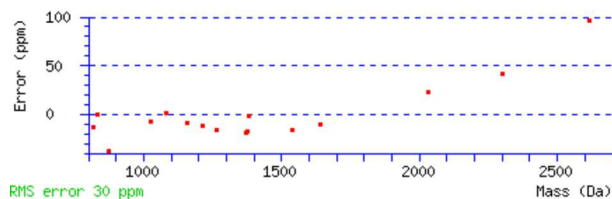

```

ID OMPA_SALTY Reviewed; 350 AA.
AC P02936;
DT 21-JUL-1986, integrated into UniProtKB/Swiss-Prot.
DT 23-JAN-2002, sequence version 2.
DT 16-MAY-2012, entry version 100.
DE RecName: Full=Outer membrane protein A;
DE AltName: Full=Outer membrane major heat-modifiable protein;
DE AltName: Full=Outer membrane protein 33K;
DE Flags: Precursor;
GN Name=ompA; OrderedLocusNames=STM1070;
OS Salmonella typhimurium (strain LT2 / SGSC1412 / ATCC 700720).
OC Bacteria; Proteobacteria; Gammaproteobacteria; Enterobacteriales;
OC Enterobacteriaceae; Salmonella;
OC Salmonella enterica subsp. enterica serovar Typhimurium.
OX NCBI_TaxID=99287;
RN [1]
RP NUCLEOTIDE SEQUENCE [GENOMIC DNA].
RX MEDLINE=83287368; PubMed=6349993;
RX DOI=10.1111/j.1432-1033.1983.tb07594.x;
RA Freudl R., Cole S.T.;
RT "Cloning and molecular characterization of the ompA gene from
RT Salmonella typhimurium.";
RL Eur. J. Biochem. 134:497-502(1983).
RN [2]
RP NUCLEOTIDE SEQUENCE [LARGE SCALE GENOMIC DNA].
RC STRAIN=LT2 / SGSC1412 / ATCC 700720;
    
```

RX MEDLINE=21534948; PubMed=11677609; DOI=10.1038/35101614;  
RA McClelland M., Sanderson K.E., Spieth J., Clifton S.W., Latreille P.,  
RA Courtney L., Porwollik S., Ali J., Dante M., Du F., Hou S., Layman D.,  
RA Leonard S., Nguyen C., Scott K., Holmes A., Grewal N., Mulvaney E.,  
RA Ryan E., Sun H., Florea L., Miller W., Stoneking T., Nhan M.,  
RA Waterston R., Wilson R.K.;  
RT "Complete genome sequence of Salmonella enterica serovar Typhimurium  
RT LT2.";  
RL Nature 413:852-856(2001).  
CC !- FUNCTION: Required for the action of colicins K and L and for the  
CC stabilization of mating aggregates in conjugation. Serves as a  
CC receptor for a number of T-even like phages. Also acts as a porin  
CC with low permeability that allows slow penetration of small  
CC solutes (By similarity).  
CC !- SUBUNIT: Monomer (Probable).  
CC !- SUBCELLULAR LOCATION: Cell outer membrane; Multi-pass membrane  
CC protein.  
CC !- SIMILARITY: Belongs to the OmpA family.  
CC !- SIMILARITY: Contains 1 OmpA-like domain.  
CC -----  
CC Copyrighted by the UniProt Consortium, see <http://www.uniprot.org/terms>  
CC Distributed under the Creative Commons Attribution-NoDerivs License  
CC -----  
DR EMBL; X02006; CAA26037.1; -; Genomic\_DNA.  
DR EMBL; AE006468; AAL20003.1; -; Genomic\_DNA.  
DR PIR; A03436; MMEBAT.  
DR RefSeq; NP\_460044.1; NC\_003197.1.  
DR ProteinModelPortal; P02936; -.  
DR SMR; P02936; 22-196.  
DR PRIDE; P02936; -.  
DR GeneID; 1252588; -.  
DR GenomeReviews; AE006468\_GR; STM1070.  
DR KEGG; stm:STM1070; -.  
DR PATRIC; 32380577; VBISalEnt20916\_1135.  
DR eggNOG; COG2885; -.  
DR HOGENOM; HOG000274199; -.  
DR KO; K03286; -.  
DR OMA; DDNEAQQ; -.  
DR ProtClustDB; PRK10808; -.  
DR BioCyc; STYP99287:STM1070-MONOMER; -.  
DR GO; GO:0009279; C:cell outer membrane; IEA:UniProtKB-SubCell.  
DR GO; GO:0005886; C:plasma membrane; IEA:UniProtKB-KW.  
DR GO; GO:0046930; C:pore complex; IEA:UniProtKB-KW.  
DR GO; GO:0015288; F:porin activity; IEA:UniProtKB-KW.  
DR GO; GO:0005198; F:structural molecule activity; IEA:InterPro.  
DR GO; GO:0000746; P:conjugation; IEA:UniProtKB-KW.  
DR GO; GO:0006811; P:ion transport; IEA:UniProtKB-KW.  
DR Gene3D; G3DSA:2.40.160.20; OMP\_b-brl; 1.  
DR Gene3D; G3DSA:3.30.1330.60; OmpA/MotB\_C; 1.  
DR InterPro; IPR011250; OMP\_b-brl.  
DR InterPro; IPR006664; OMP\_bac.  
DR InterPro; IPR002368; OmpA.  
DR InterPro; IPR006690; OMPA-like\_CS.  
DR InterPro; IPR000498; OmpA-like\_TM\_dom.  
DR InterPro; IPR006665; OmpA/MotB\_C.  
DR Pfam; PF00691; OmpA; 1.  
DR Pfam; PF01389; OmpA\_membrane; 1.  
DR PRINTS; PR01021; OMPADOMAIN.  
DR PRINTS; PR01022; OUTRMMBRANEA.  
DR SUPFAM; SSF103088; OmpA/MotB\_C; 1.  
DR PROSITE; PS01068; OMPA\_1; 1.  
DR PROSITE; PS51123; OMPA\_2; 1.  
PE 3: Inferred from homology;  
KW Cell membrane; Cell outer membrane; Complete proteome; Conjugation;  
KW Disulfide bond; Ion transport; Membrane; Porin; Reference proteome;  
KW Repeat; Signal; Transmembrane; Transmembrane beta strand; Transport.  
FT SIGNAL 1 21 By similarity.  
FT CHAIN 22 350 Outer membrane protein A.  
FT /FTId=PRO\_0000020099.  
FT TRANSMEM 27 40 Beta stranded; (Potential).  
FT TRANSMEM 55 67 Beta stranded; (Potential).  
FT TRANSMEM 70 85 Beta stranded; (Potential).  
FT TRANSMEM 97 107 Beta stranded; (Potential).  
FT TRANSMEM 111 126 Beta stranded; (Potential).  
FT TRANSMEM 146 157 Beta stranded; (Potential).  
FT TRANSMEM 163 179 Beta stranded; (Potential).  
FT TRANSMEM 185 196 Beta stranded; (Potential).  
FT REPEAT 205 206 1.  
FT REPEAT 207 208 2.  
FT REPEAT 209 210 3.  
FT REPEAT 211 212 4.  
FT DOMAIN 214 342 OmpA-like.  
FT REGION 205 212 4 X 2 AA tandem repeats of A-P.  
FT DISULFID 315 327 By similarity.  
FT CONFLICT 114 114 V -> F (in Ref. 1; CAA26037).  
FT CONFLICT 247 247 S -> I (in Ref. 1; CAA26037).  
SQ SEQUENCE 350 AA; 37515 MW; B4AC52C8C5DF54FE CRC64;  
MKTATAIIV ALAGFATVAQ AAPKDNTWYA GAKLGWSQYH DTGFIHNDGP THENQLGAGA  
FGGYQVNPYV GFEMGYDWLG RMPYKGDNIN GAYKAQGVQL TAKLGYPTD DLDVYTRLGG  
MVRADTKSN VPGGPSTKDH DTGVSFVDFAG GIEYAITPEI ATRLEYQWTN NIGDANTIGT  
RPDNLGSLVG VSGFQGEA APVVPAPAP APEVQTKHFT LKSDVLFNFN KSTLKPGEQQ  
ALDQLYSQLS NLDPKDGSVV VLGFTDRIGS DAYNQLSEK RAQSVVDYLI SKGIPSDKIS  
ARGMGESNPV TGNTCDNVKP RAALIDCLAP DRRVEIEVKG VKDVVTQPQA
